# Supplementary figures and images for: Non-functional pancreatic neuroendocrine tumours: ATRX/DAXX and alternative lengthening of telomeres (ALT) are prognostically independent from ARX/PDX1 expression and tumour size
Source: HighWire-hosted journal article supplement (doi:10.1136/gutjnl-2020-322595), 2021-04-13

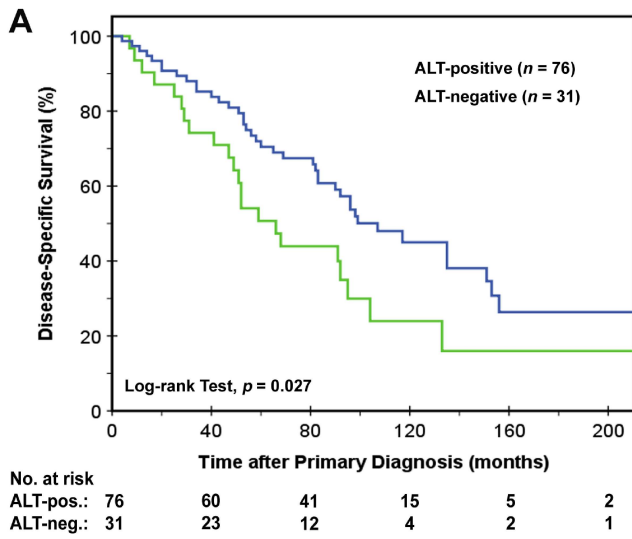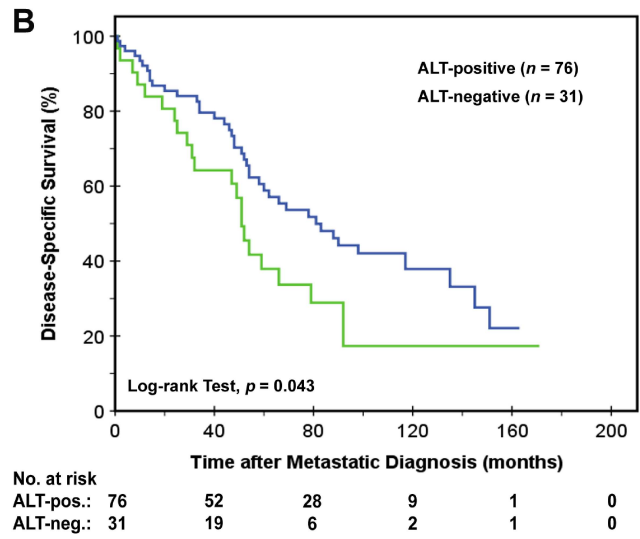

Supplement: gutjnl-2020-322595supp005_data_supplement.pdf [file gutjnl-2020-322595supp005_data_supplement.pdf]

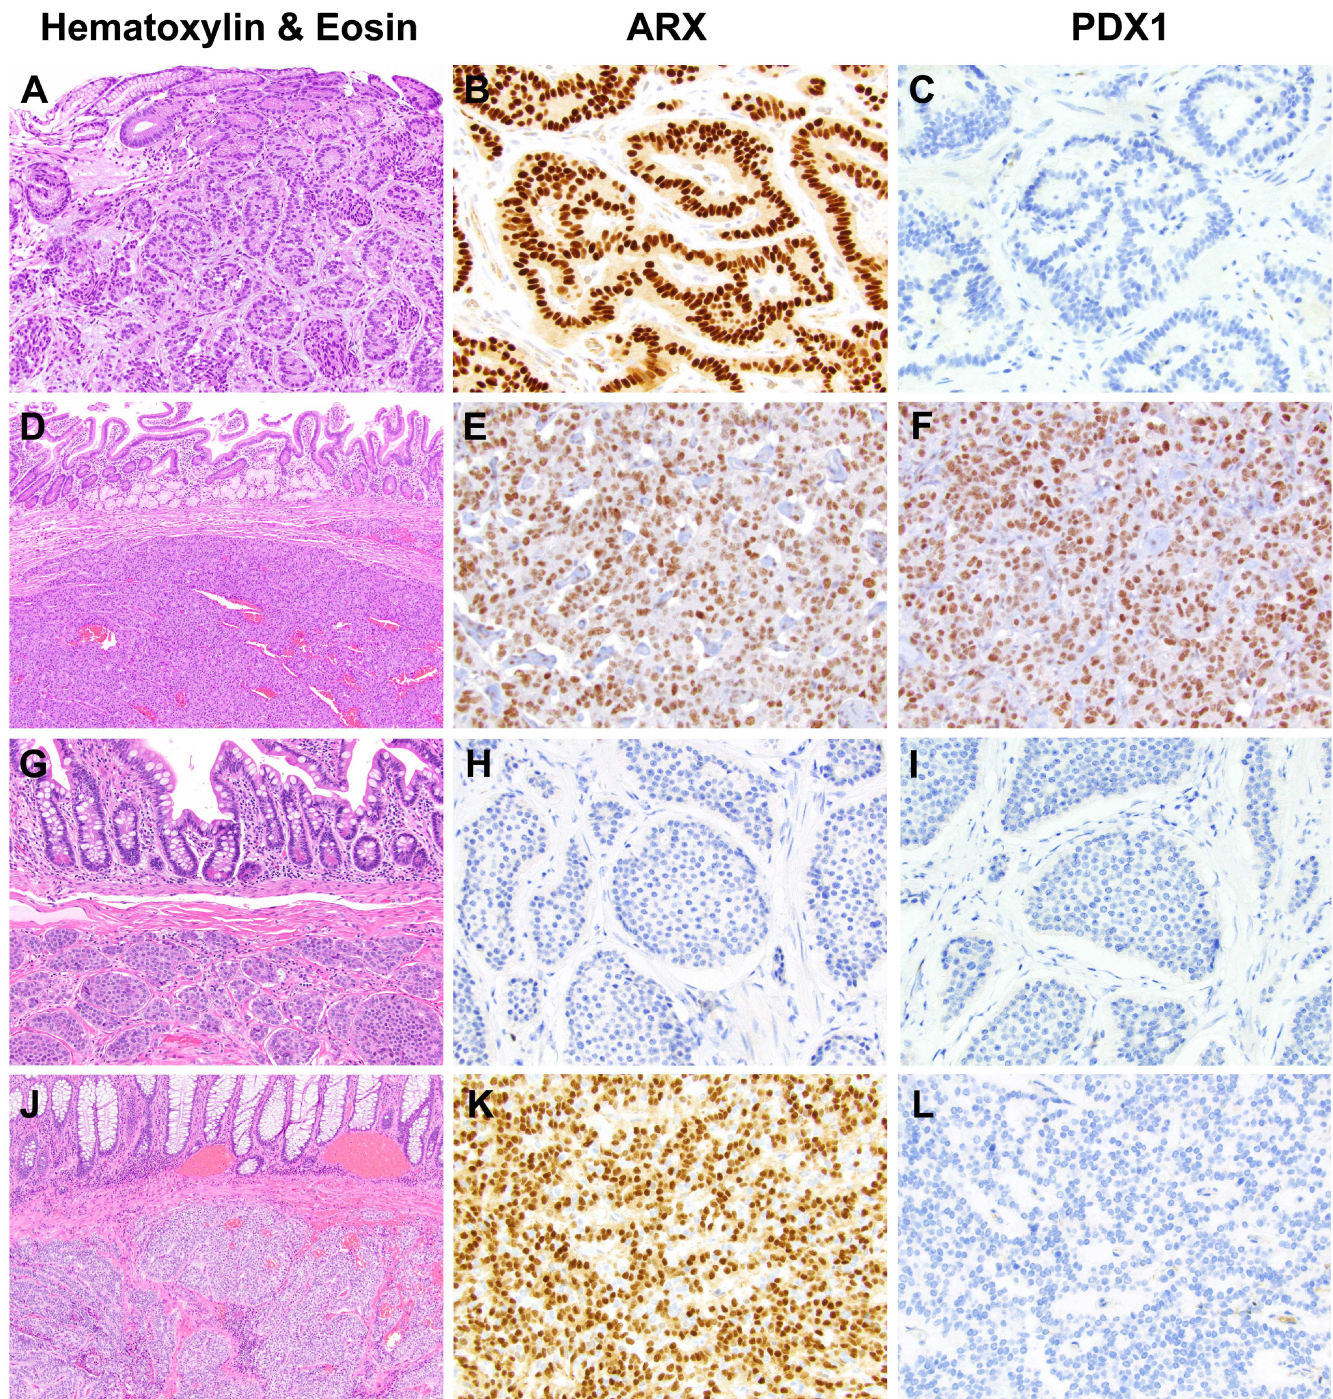

Supplement: gutjnl-2020-322595supp006_data_supplement.pdf [file gutjnl-2020-322595supp006_data_supplement.pdf]

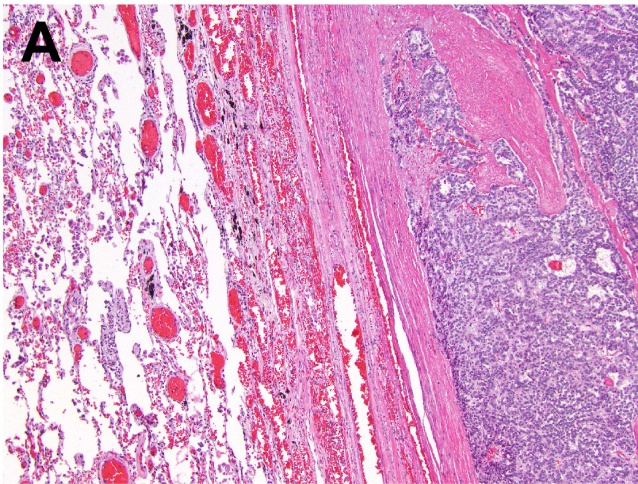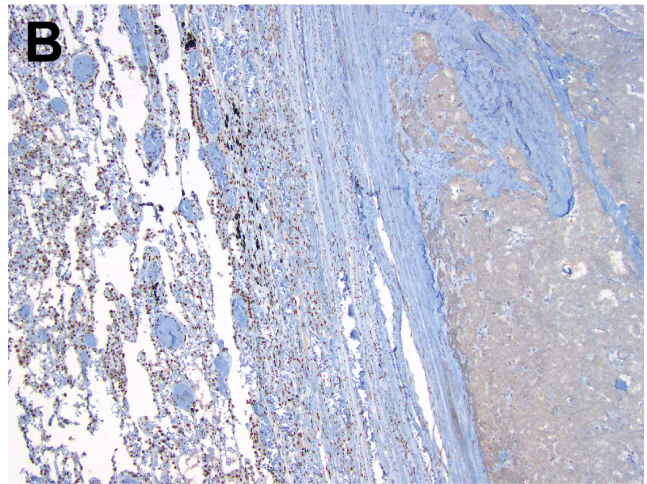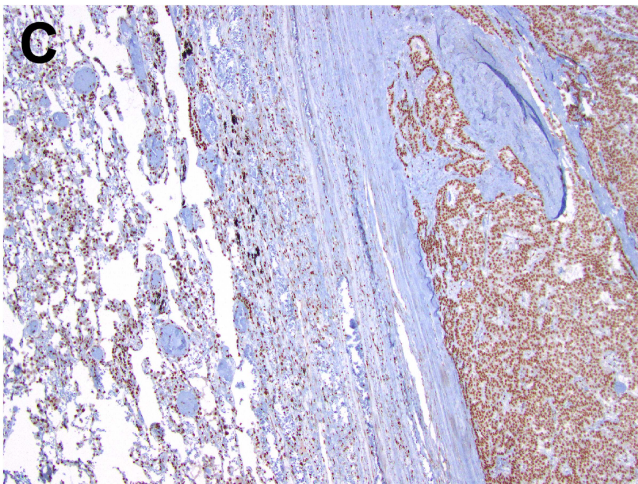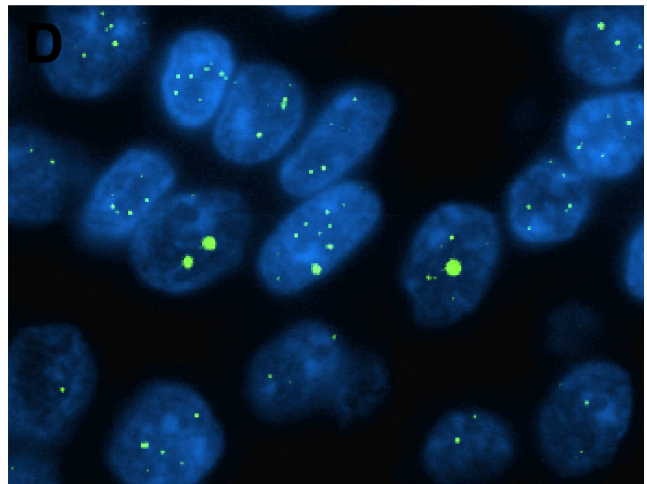

Supplement: gutjnl-2020-322595supp007_data_supplement.pdf [file gutjnl-2020-322595supp007_data_supplement.pdf]

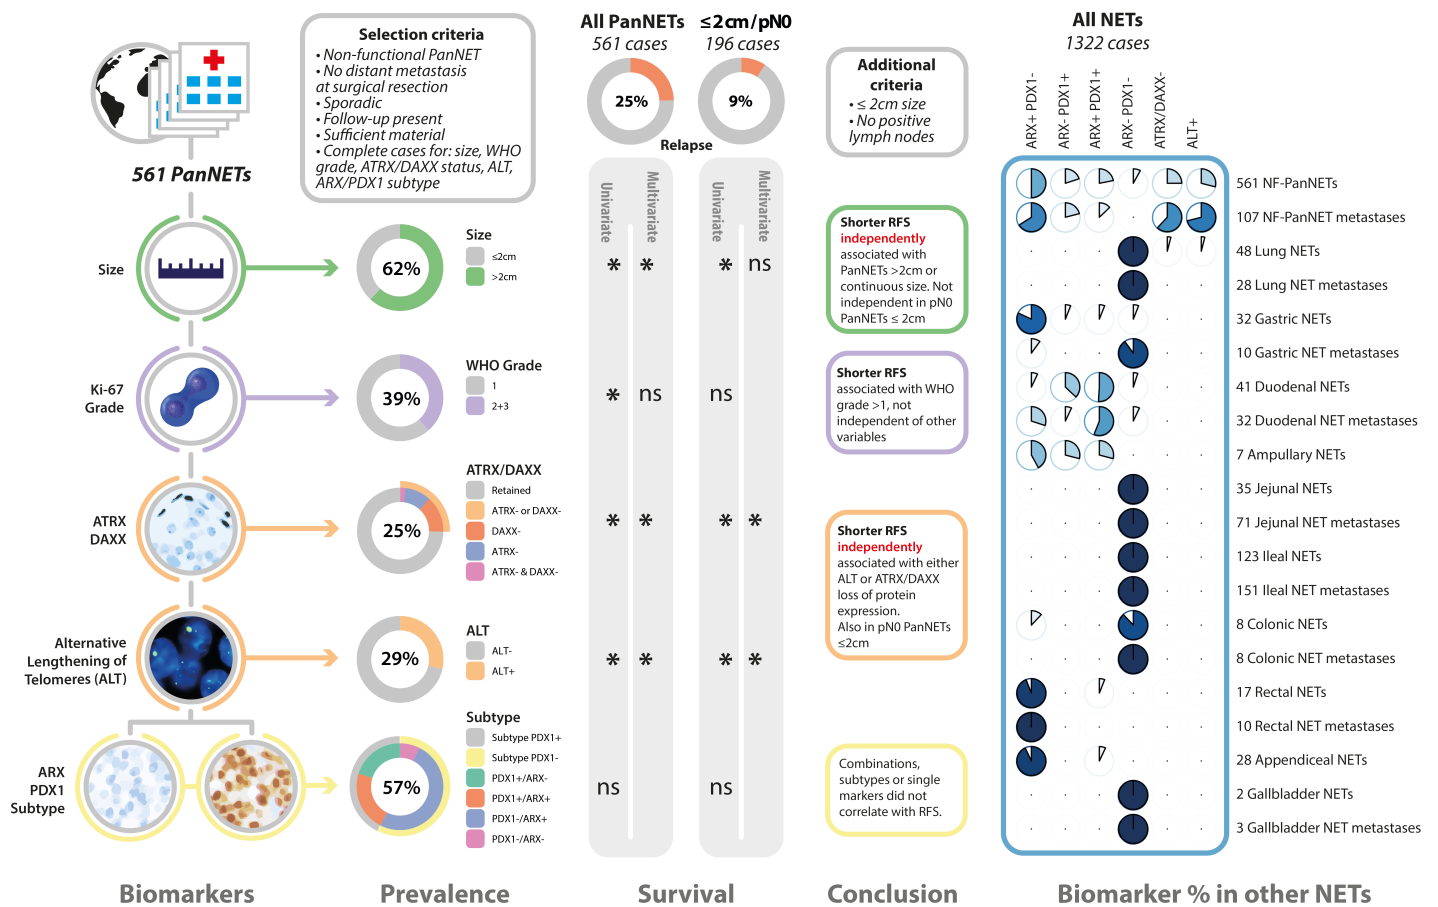

Supplement: gutjnl-2020-322595supp008_data_supplement.pdf [file gutjnl-2020-322595supp008_data_supplement.pdf]
